# Supplementary material for: Higher frequency of interstate over international transmission chains of SARS-CoV-2 virus at the Rio Grande do Sul - Brazil state borders
Source: PubMed Central journal article supplement (PMC11720880; doi:10.1016/j.virusres.2024.199500), 2024-12-17

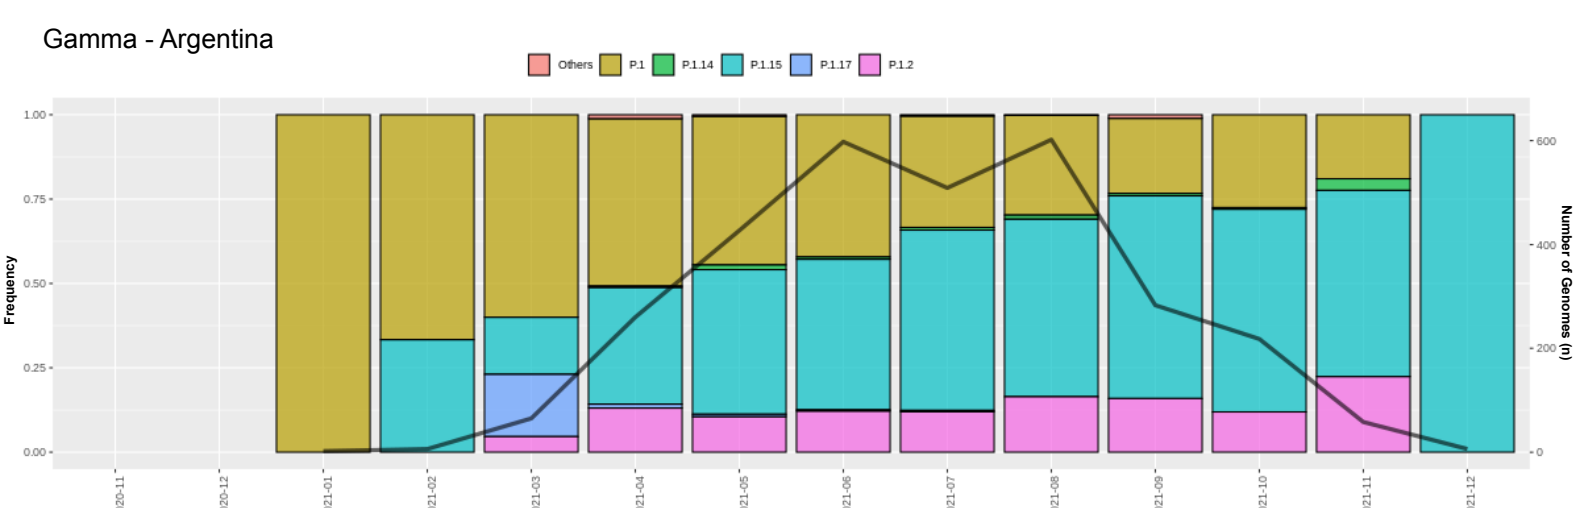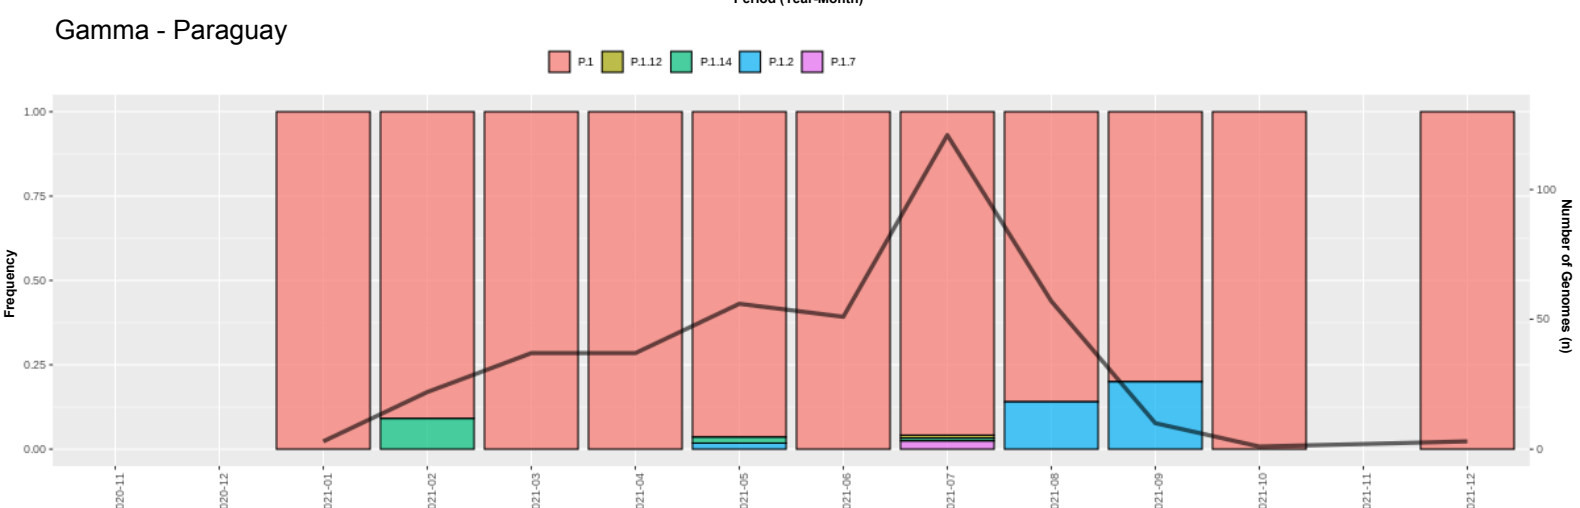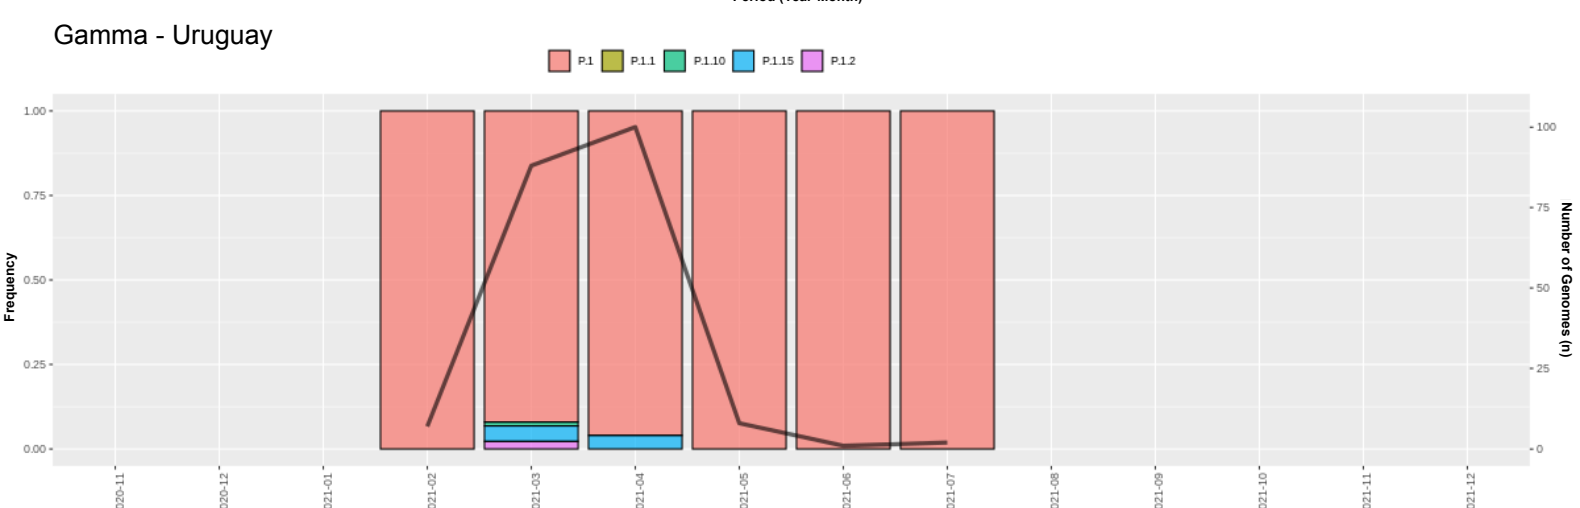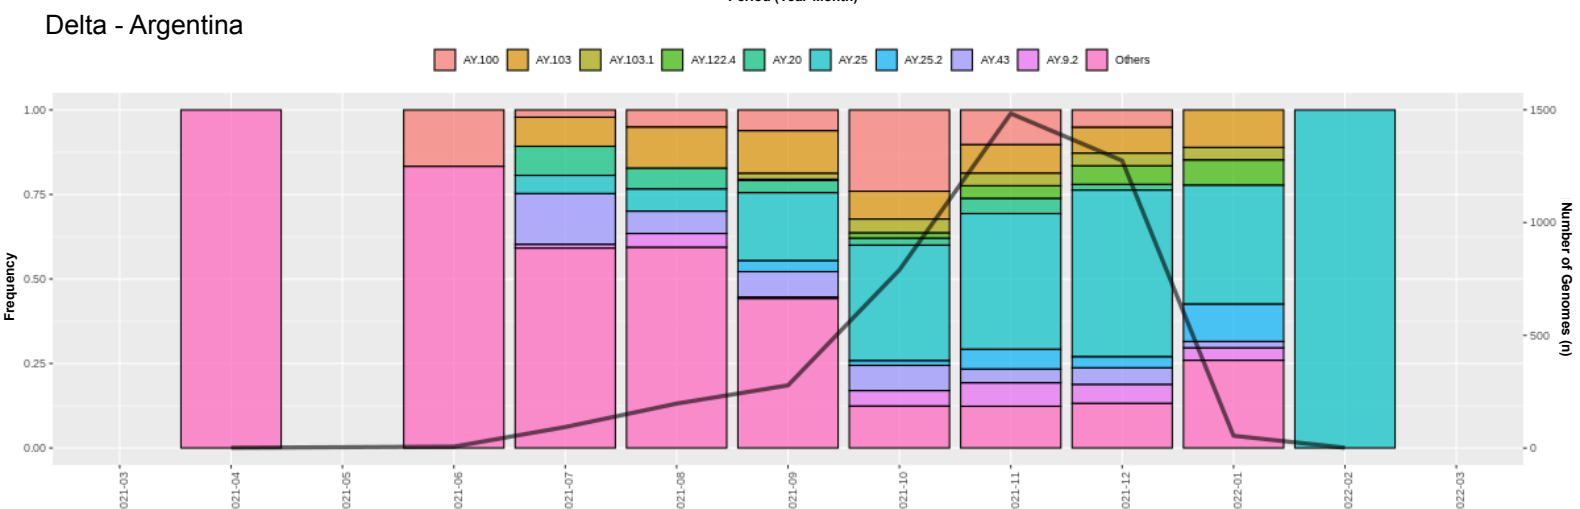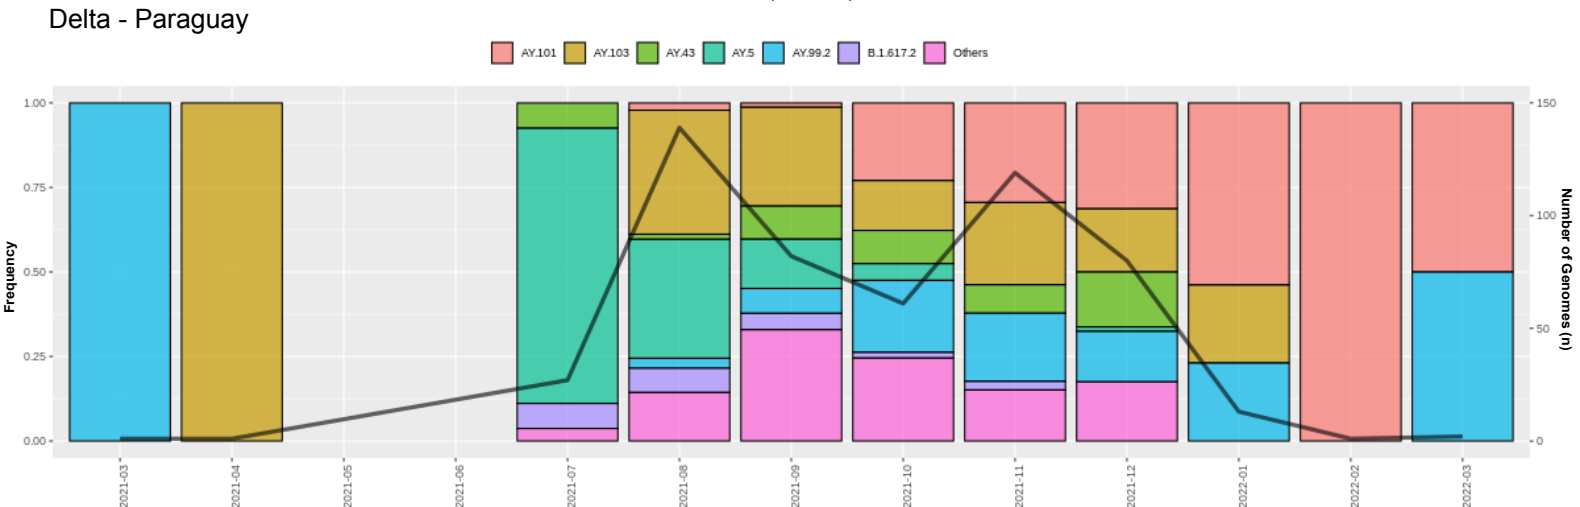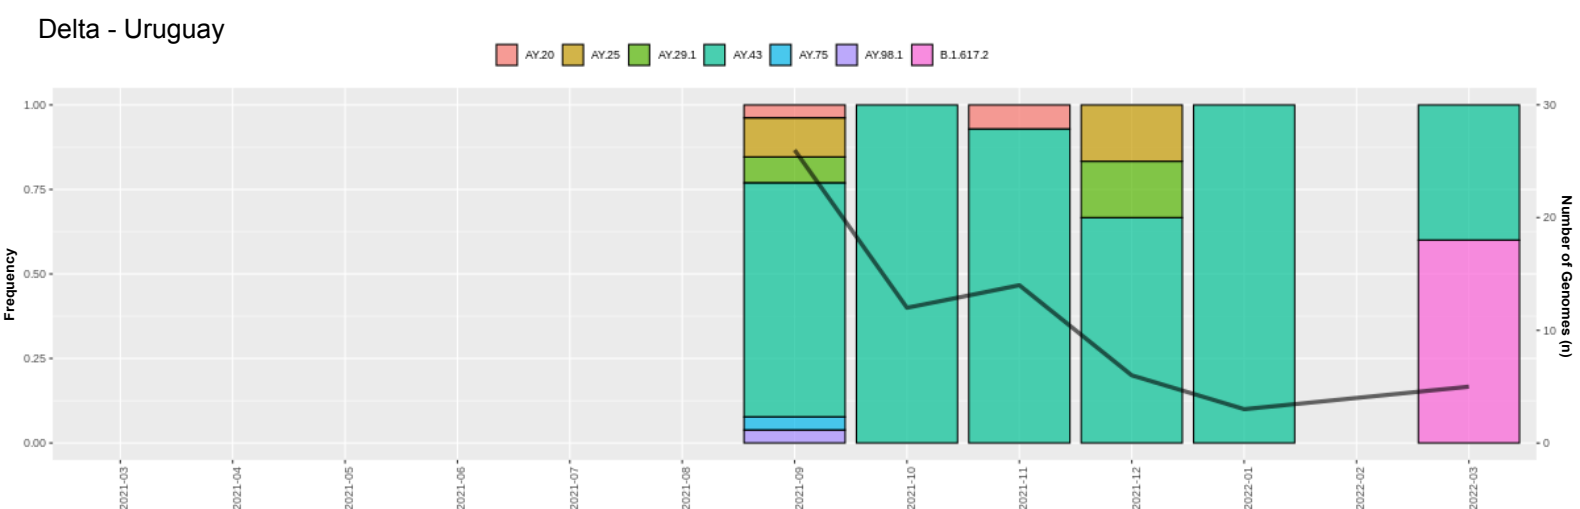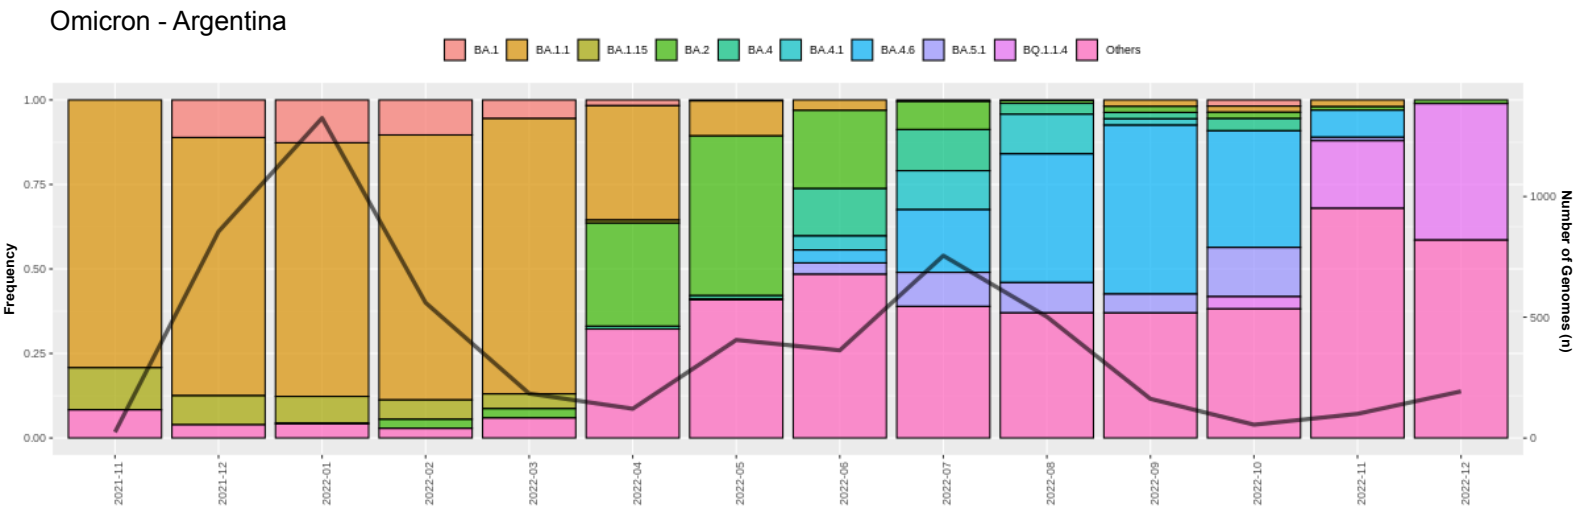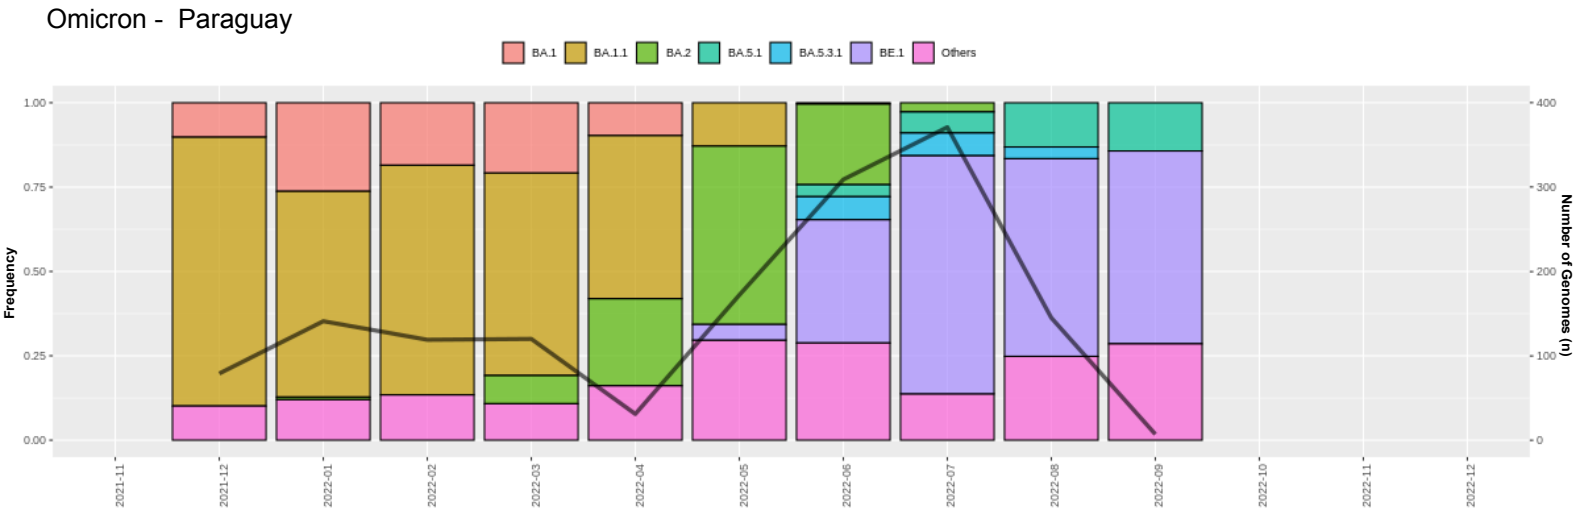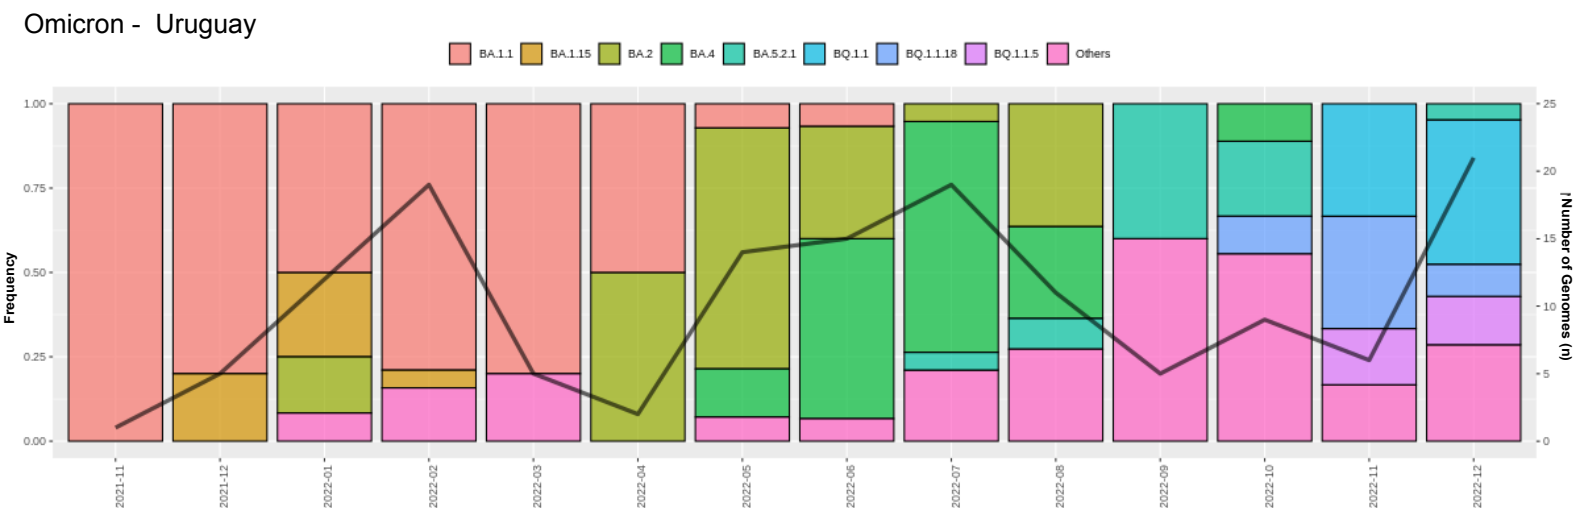

Supplement: mmc9.pdf [file mmc9.pdf]
